# Supplementary material
Source: PubMed Central journal article supplement (PMC6206847)

**Appendix for article Home vs Office Biofeedback therapy by Rao SS et al (18-00198)**

Supplemental Table S1. Per-protocol analysis comparing bowel symptoms and stool diary data between home biofeedback and office biofeedback groups

| Subjective parameters    | Time                | Home Biofeedback<br>(n=38) | Office Biofeedback<br>(n=45) | Test of non-inferiority |                                       |                         |         |
|--------------------------|---------------------|----------------------------|------------------------------|-------------------------|---------------------------------------|-------------------------|---------|
|                          |                     | Mean<br>(SEM or 95% CI)    | Mean<br>(SEM or 95% CI)      | Ho: Bound               | Mean Difference or ratio <sup>1</sup> | 90% CI                  | p-value |
| No. of CSBM/week         | Baseline            | 0.68 (0.19)                | 1.29 (0.31)                  |                         |                                       |                         |         |
|                          | Post                | 3.61 (0.44)                | 5.13 (0.62)                  | <0.70                   | 0.70                                  | ( <b>0.53</b> , 0.93)   | 0.492   |
|                          | Ratio <sup>2</sup>  | 5.27 (3.20, 8.68)*         | 3.98 (2.55, 6.22)*           | <0.70                   | 1.32                                  | ( <b>0.76</b> , 2.30)   | 0.030   |
| No. of stools/week       | Baseline            | 5.24 (0.58)                | 5.92 (0.76)                  |                         |                                       |                         |         |
|                          | Post                | 6.29 (0.63)                | 8.84 (0.93)                  | <0.75                   | 0.71                                  | ( <b>0.56</b> , 0.90)   | 0.642   |
|                          | Ratio <sup>2</sup>  | 1.20 (0.94, 1.54)          | 1.49 (1.10, 2.03)*           | <0.75                   | 0.80                                  | ( <b>0.58</b> , 1.11)   | 0.361   |
| Stool strain score (1-3) | Baseline            | 1.84 (0.08)                | 1.96 (0.09)                  |                         |                                       |                         |         |
|                          | Post                | 1.39 (0.06)                | 1.66 (0.07)                  | >0.25                   | -0.27                                 | (-0.45, - <b>0.12</b> ) | <0.001  |
|                          | Change <sup>2</sup> | -0.45 (-0.64, -0.25)*      | -0.30 (-0.51, -0.10)*        | >0.25                   | -0.15                                 | (-0.38, <b>0.08</b> )   | 0.003   |
| Stool consistency (1-7)  | Baseline            | 3.44 (0.18)                | 3.29 (0.20)                  |                         |                                       |                         |         |
|                          | Post                | 3.48 (0.17)                | 3.51 (0.20)                  | <-0.50                  | -0.03                                 | (- <b>0.47</b> , 0.41)  | 0.039   |
|                          | Change <sup>2</sup> | 0.05 (-0.34, 0.43)         | 0.22 (-0.26, 0.70)           | <-0.50                  | -0.17                                 | (- <b>0.68</b> , 0.33)  | 0.152   |

|                                 |                     |                       |                       |      |     |                             |           |
|---------------------------------|---------------------|-----------------------|-----------------------|------|-----|-----------------------------|-----------|
| Bowel satisfaction-<br>VAS (mm) | Baseline            | 13.3 (2.5)            | 17.8 (3.1)            |      |     |                             |           |
|                                 | Post                | 59.9 (4.7)            | 59.9 (3.9)            | <-13 | 0.0 | <b>(-12.0,</b><br>12.1)     | 0.01<br>7 |
|                                 | Change <sup>2</sup> | 46.6 (36.7,<br>56.5)* | 42.1 (33.5,<br>50.7)* | <-13 | 4.5 | <b>(-6.2,</b><br>15.2)      | 0.00<br>4 |
| Digital assistance (%)          | Baseline            | 19 (50%)              | 24 (53%)              |      |     |                             |           |
|                                 | Post                | 6 (16%)               | 4 (9%)                | >5%  | 7%  | <b>(-5%,</b><br><b>19%)</b> | 0.60<br>4 |

<sup>1</sup>Difference=Home-Office; Ratio=Home/Office

<sup>2</sup>Ratio=Post/Baseline; Change=Post-Baseline

\*Significant change from baseline

Supplemental Table S2. Per protocol analysis comparing the anorectal physiology parameters and colonic transit time results between home biofeedback and office biofeedback groups

| Physiological parameters    | Time               | Home Biofeedback<br>(n=38) | Office Biofeedback<br>(n=45) | Test of non-inferiority |                                       |              |         |
|-----------------------------|--------------------|----------------------------|------------------------------|-------------------------|---------------------------------------|--------------|---------|
|                             |                    | Mean<br>(SEM or 95% CI)    | Mean<br>(SEM or 95% CI)      | Ho: Bound               | Mean Difference or ratio <sup>1</sup> | 90% CI       | p-value |
| Dyssynergia (%)             | Baseline           | 38 (100%)                  | 45 (100%)                    |                         |                                       |              |         |
|                             | Post               | 3 (8%)*                    | 7 (16%)*                     | >10%                    | -8%                                   | (-20%, 5%)   | 0.046   |
| Balloon expulsion time (s)+ | Baseline           | 68.1 (13.8)                | 54.2 (11.4)                  |                         |                                       |              |         |
|                             | Post               | 11.8 (1.6)                 | 14.9 (2.5)                   | >1.70                   | 0.79                                  | (0.55, 1.14) | <0.001  |
|                             | Ratio <sup>2</sup> | 0.17 (0.12, 0.26)*         | 0.28 (0.19, 0.41)*           | >1.70                   | 0.63                                  | (0.36, 1.10) | <0.001  |
| Abnormal BET (%)            | Baseline           | 22 (58%)                   | 23 (51%)                     |                         |                                       |              |         |
|                             | Post               | 2 (5%)*                    | 5 (11%)*                     | >5%                     | -6%                                   | (-17%, 5%)   | 0.050   |
| Defecation index+           | Baseline           | 0.51 (0.05)                | 0.49 (0.05)                  |                         |                                       |              |         |
|                             | Post               | 2.44 (0.32)                | 1.87 (0.26)                  | <0.65                   | 1.30                                  | (0.94, 1.80) | <0.001  |
|                             | Ratio <sup>2</sup> | 4.81 (3.40, 6.79)*         | 3.83 (2.83, 5.18)*           | <0.65                   | 1.26                                  | (0.80, 1.97) | 0.002   |
| Slow transit (%)            | Baseline           | 23 (61%)                   | 20 (44%)                     |                         |                                       |              |         |
|                             | Post               | 10 (26%)*                  | 14 (32%)                     | >10%                    | -5%                                   | (-21%, 12%)  | 0.071   |
| <b>Responder (%)</b>        | Post               | 32 (84%)                   | 35 (78%)                     | <-10%                   | 6%                                    | (-8%, 21%)   | 0.034   |

<sup>1</sup>Difference=Home-Office; Ratio=Home/Office

<sup>2</sup>Ratio=Post/Baseline; Change=Post-Baseline

\*Significant change from baseline

+Log transformed data

Supplemental Table S3. Per-protocol analysis comparing the rectal sensory thresholds between the home biofeedback and office biofeedback groups

| Sensory Threshold  | Time          | Home Biofeedback<br>(n=38) | Office Biofeedback<br>(n=45) | Home-Office          |                           |
|--------------------|---------------|----------------------------|------------------------------|----------------------|---------------------------|
|                    |               | Median<br>(IQR)            | Median<br>(IQR or 95%<br>CI) | Median<br>Difference | 90% CI                    |
| First sensation    | Baseline      | 10 (10-30)                 | 20 (10-30)                   |                      |                           |
|                    | Post          | 10 (10-20)                 | 20 (10-20)                   | -10                  | (-15.5, -<br><b>4.5</b> ) |
|                    | Post-Baseline | 0 (-20-0)                  | 0 (-10-0)*                   | 0                    | (-3.9, <b>3.9</b> )       |
| Desire to defecate | Baseline      | 75 (60-130)                | 80 (70-120)                  |                      |                           |
|                    | Post          | 70 (70-110)                | 80 (50-100)                  | -10                  | (-26.5,<br><b>6.5</b> )   |
|                    | Post-Baseline | 0 (-60-30)                 | 0 (-30-30)                   | 0                    | (-24.5,<br><b>24.5</b> )  |
| Urge to defecate   | Baseline      | 170 (100-250)              | 150 (110-220)                |                      |                           |
|                    | Post          | 170 (100-190)              | 140 (110-170)                | 30                   | (4.0,<br><b>56.0</b> )    |
|                    | Post-Baseline | 0 (-50-30)                 | -10 (-50-20)                 | 10                   | (-12.0,<br><b>32.0</b> )  |

Table 5. Post-treatment survey comparing the use and effects of Home and Office biofeedback training and devices

| <b>Survey Question</b>                         | <b>Home Biofeedback<br/>(n=38)</b> | <b>Office Biofeedback<br/>(n=43)</b> | <b>p-value</b> |
|------------------------------------------------|------------------------------------|--------------------------------------|----------------|
| I missed work to attend training               | 11 (29%)                           | 18 (42%)                             | 0.22           |
| I had to make special arrangements             | 3 (8%)                             | 17 (40%)                             | 0.03           |
| Verbal Instructions were helpful               | 37 (97%)                           | 42 (98%)                             | 1.00           |
| Written Instructions were helpful              | 36 (95%)                           | --                                   | --             |
| Training sessions were not time consuming      | 15 (39%)                           | 22 (51%)                             | 0.29           |
| Training interfered with other things          | 11 (29%)                           | 7 (16%)                              | 0.17           |
| Training created social problems at home       | 10 (26%)                           | 1 (2%)                               | 0.00           |
| Probe insertion was painful                    | 12 (32%)                           | 8 (19%)                              | 0.17           |
| Using device/Biofeedback training was messy    | 14 (37%)                           | 5 (12%)                              | 0.00           |
| Device/Training was embarrassing               | 17 (45%)                           | 18 (42%)                             | 0.79           |
| Using home device was easy                     | 26 (68%)                           | NA                                   |                |
| Caring for home device was easy and convenient | 35 (92%)                           | NA                                   |                |
| Helped me carry out my daily tasks             | 19 (50%)                           | 18 (42%)                             | 0.46           |
| I felt better after biofeedback training       | 28 (74%)                           | 30 (70%)                             | 0.69           |
| Biofeedback training was rewarding             | 33 (87%)                           | 38 (88%)                             | 1.00           |
| I would recommend this training                | 35 (92%)                           | 38 (88%)                             | 0.71           |

\*p-value from Chi-square test or Fisher's exact test

**Figure 2.** This shows the effects of home and office biofeedback therapy on the number of CSBMs/week, the defecation index and the number of subjects with dyssynergic pattern of defecation.

**Figure 2. This shows the effects of home and office biofeedback therapy on the number of CSBMs/week, the defecation index and the number of subjects with dyssynergic pattern of defecation.**

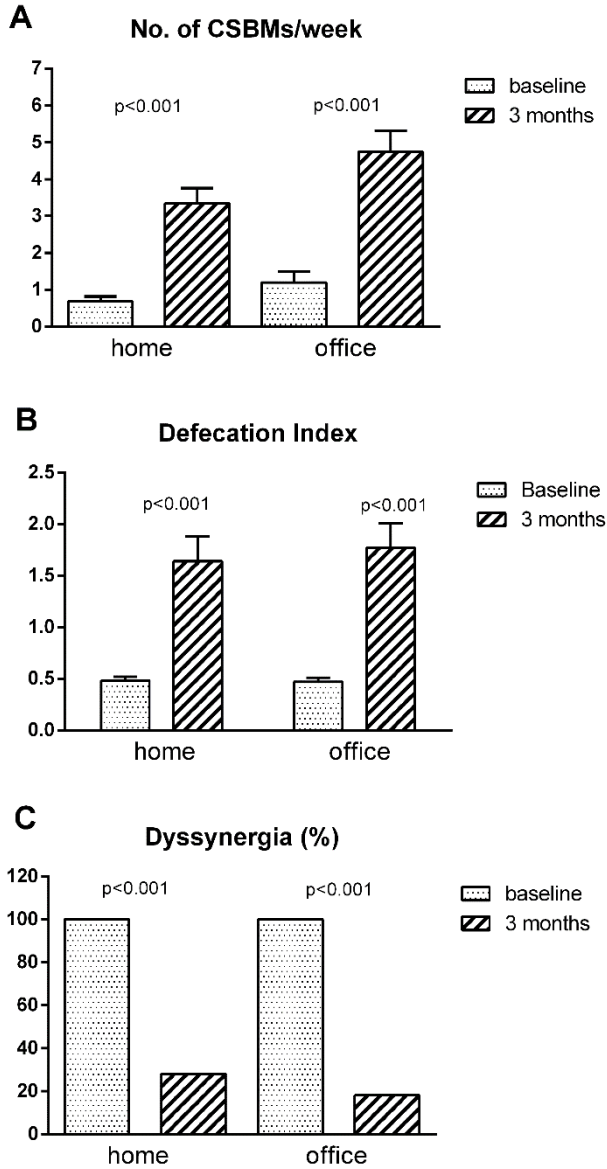

Supplement: NIHMS989813-supplement-1.pdf [file NIHMS989813-supplement-1.pdf]
